# Supplementary material
Source: ML conference proceedings conference paper supplement (https://proceedings.mlr.press/v80/xu18g.html)
Supplement: Supplementary file [file xu18g-supp.pdf]

## A. Proof of Convergence of Continuous-time Dynamics

In this section, we provide a detailed Lyapunov function based analysis for the convergence of continuous-time dynamics (3.9).

*Proof of Theorem 4.1.* Applying Itô Formula (Itô, 1944) to the Lyapunov function in (4.1) yields

$$d\mathcal{E}_t = \frac{\partial \mathcal{E}_t}{\partial t} dt + \left\langle \frac{\partial \mathcal{E}_t}{\partial \mathbf{X}_t}, d\mathbf{X}_t \right\rangle + \left\langle \frac{\partial \mathcal{E}_t}{\partial \mathbf{Y}_t}, d\mathbf{Y}_t \right\rangle + \frac{\delta \dot{\beta}_t^2}{2\mu^2} \text{tr} \left( \boldsymbol{\sigma}_t^\top \frac{\partial^2 \mathcal{E}_t}{\partial \mathbf{Y}_t^2} \boldsymbol{\sigma}_t \right) dt, \quad (\text{A.1})$$

where we use  $\boldsymbol{\sigma}_t$  to make the expression  $\boldsymbol{\sigma}(\mathbf{X}_t, t)$  compact when no confusion arises. Note that we have

$$\begin{aligned} \frac{\partial \mathcal{E}_t}{\partial t} &= \dot{\beta}_t e^{\beta t} (f(\mathbf{X}_t) - f(\mathbf{x}^*) + \mu D_h(\mathbf{x}^*, \nabla h^*(\mathbf{Y}_t))), \\ \frac{\partial \mathcal{E}_t}{\partial \mathbf{X}_t} &= e^{\beta t} \nabla f(\mathbf{X}_t), \quad \frac{\partial \mathcal{E}_t}{\partial \mathbf{Y}_t} = \mu e^{\beta t} (\nabla h^*(\mathbf{Y}_t) - \mathbf{x}^*). \end{aligned}$$

Thus, combining the above partial derivatives with the SDE in (3.9), we obtain

$$\left\langle \frac{\partial \mathcal{E}_t}{\partial \mathbf{X}_t}, d\mathbf{X}_t \right\rangle = \dot{\beta}_t e^{\beta t} \langle \nabla f(\mathbf{X}_t), \nabla h^*(\mathbf{Y}_t) - \mathbf{X}_t \rangle,$$

and

$$\left\langle \frac{\partial \mathcal{E}_t}{\partial \mathbf{Y}_t}, d\mathbf{Y}_t \right\rangle = -\dot{\beta}_t e^{\beta t} \langle \nabla f(\mathbf{X}_t) dt + \mu(\mathbf{Y}_t - \nabla h(\mathbf{X}_t)) + \sqrt{\delta} \boldsymbol{\sigma} dB_t, \nabla h^*(\mathbf{Y}_t) - \mathbf{x}^* \rangle.$$

Submitting the above equations back into (A.1) yields

$$\begin{aligned} d\mathcal{E}_t &= \dot{\beta}_t e^{\beta t} [f(\mathbf{X}_t) - f(\mathbf{x}^*) + \langle \nabla f(\mathbf{X}_t), \mathbf{x}^* - \mathbf{X}_t \rangle] dt + \dot{\beta}_t e^{\beta t} \mu D_h(\mathbf{x}^*, \nabla h^*(\mathbf{Y}_t)) dt \\ &\quad - \mu \dot{\beta}_t e^{\beta t} \langle \nabla h^*(\mathbf{Y}_t) - \mathbf{x}^*, \mathbf{Y}_t - \nabla h(\mathbf{X}_t) \rangle dt - \dot{\beta}_t e^{\beta t} \langle \nabla h^*(\mathbf{Y}_t) - \mathbf{x}^*, \boldsymbol{\sigma}_t dB_t \rangle + \frac{\delta \dot{\beta}_t^2}{2\mu^2} \text{tr} \left( \boldsymbol{\sigma}_t^\top \frac{\partial^2 \mathcal{E}_t}{\partial \mathbf{Y}_t^2} \boldsymbol{\sigma}_t \right) dt \\ &\leq \mu \dot{\beta}_t e^{\beta t} [-D_h(\mathbf{x}^*, \mathbf{X}_t) + D_h(\mathbf{x}^*, \nabla h^*(\mathbf{Y}_t))] dt - \mu \dot{\beta}_t e^{\beta t} \langle \nabla h^*(\mathbf{Y}_t) - \mathbf{x}^*, \mathbf{Y}_t - \nabla h(\mathbf{X}_t) \rangle dt \\ &\quad - \dot{\beta}_t e^{\beta t} \langle \nabla h^*(\mathbf{Y}_t) - \mathbf{x}^*, \boldsymbol{\sigma}_t dB_t \rangle + \frac{\delta \dot{\beta}_t^2}{2\mu^2} \text{tr} \left( \boldsymbol{\sigma}_t^\top \frac{\partial^2 \mathcal{E}_t}{\partial \mathbf{Y}_t^2} \boldsymbol{\sigma}_t \right) dt, \end{aligned}$$

where the inequality is due to the strong convexity of  $f$ . By three point identity (Chen & Teboulle, 1993), we have

$$D_h(\mathbf{x}^*, \nabla h^*(\mathbf{Y}_t)) + D_h(\nabla h^*(\mathbf{Y}_t), \mathbf{X}_t) - D_h(\mathbf{x}^*, \mathbf{X}_t) = \langle \nabla h(\mathbf{X}_t) - \mathbf{Y}_t, \mathbf{x}^* - \nabla h^*(\mathbf{Y}_t) \rangle.$$

Therefore, we obtain

$$\begin{aligned} d\mathcal{E}_t &\leq -\mu \dot{\beta}_t e^{\beta t} D_h(\nabla h^*(\mathbf{Y}_t), \mathbf{X}_t) dt - \dot{\beta}_t e^{\beta t} \langle \nabla h^*(\mathbf{Y}_t) - \mathbf{x}^*, \boldsymbol{\sigma}_t dB_t \rangle + \frac{\delta \dot{\beta}_t^2}{2\mu^2} \text{tr} \left( \boldsymbol{\sigma}_t^\top \frac{\partial^2 \mathcal{E}_t}{\partial \mathbf{Y}_t^2} \boldsymbol{\sigma}_t \right) dt \\ &\leq -\dot{\beta}_t e^{\beta t} \langle \nabla h^*(\mathbf{Y}_t) - \mathbf{x}^*, \boldsymbol{\sigma}_t dB_t \rangle + \frac{\delta \dot{\beta}_t^2}{2\mu^2} \text{tr} \left( \boldsymbol{\sigma}_t^\top \frac{\partial^2 \mathcal{E}_t}{\partial \mathbf{Y}_t^2} \boldsymbol{\sigma}_t \right) dt. \end{aligned}$$

Integrating  $d\mathcal{E}_t$  from 0 to  $t$ , we obtain

$$\mathcal{E}_t \leq \mathcal{E}_0 - \int_0^t \dot{\beta}_t e^{\beta t} \langle \nabla h^*(\mathbf{Y}_t) - \mathbf{x}^*, \boldsymbol{\sigma}_t dB_t \rangle + \int_0^t \frac{\delta \dot{\beta}_r^2 e^{\beta r}}{2\mu} \text{tr} (\boldsymbol{\sigma}_r^\top \nabla^2 h^*(\mathbf{Y}_r) \boldsymbol{\sigma}_r) dr.$$

Taking expectation and by the property of Brownian motion, we have

$$\mathbb{E}[\mathcal{E}_t] \leq \mathcal{E}_0 + \mathbb{E} \left[ \int_0^t \frac{\delta \dot{\beta}_r^2 e^{\beta r}}{2\mu} \text{tr} (\boldsymbol{\sigma}_r^\top \nabla^2 h^*(\mathbf{Y}_r) \boldsymbol{\sigma}_r) dr \right].$$

By the definition of  $\mathcal{E}_t$  and the non-negativity of  $D_{h^*}$ , we obtain the upper bound on the expected primal function value gap

$$\mathbb{E}[f(\mathbf{X}_t) - f(\mathbf{x}^*)] \leq e^{-\beta t} \mathcal{E}_0 + e^{-\beta t} \mathbb{E} \left[ \int_0^t \frac{\delta \dot{\beta}_r^2 e^{\beta r}}{2\mu} \text{tr} (\boldsymbol{\sigma}_r^\top \nabla^2 h^*(\mathbf{Y}_r) \boldsymbol{\sigma}_r) dr \right],$$

which completes the proof.  $\square$

## B. Proof of Convergence for Discrete-time Algorithms

We provide proofs of convergence rates of the proposed Algorithms here. For the shorthand of notation, we use  $\Delta(\mathbf{x}) = G(\mathbf{x}; \xi) - \nabla f(\mathbf{x})$  to denote the bias between the stochastic gradient and the full gradient, where  $\mathbf{x} \in \mathbb{R}^d$  and  $\xi$  is a random vector.

### B.1. Proof of Theorem 5.1

*Proof of Theorem 5.1.* For the ease of presentation, we define  $\mathcal{D}_k = f(\mathbf{x}_k) - f(\mathbf{x}^*) + \mu D_{h^*}(\mathbf{y}_k, \nabla h(\mathbf{x}^*))$ . By the definition of Lyapunov function in (5.4), we have  $\mathcal{E}_k = A_k \mathcal{D}_k$ . Then

$$\begin{aligned} \mathbb{E}[\mathcal{D}_{k+1} - \mathcal{D}_k] &= \mathbb{E}[f(\mathbf{x}_{k+1}) - f(\mathbf{x}_k) + \mu D_{h^*}(\mathbf{y}_{k+1}, \nabla h(\mathbf{x}^*)) - \mu D_{h^*}(\mathbf{y}_k, \nabla h(\mathbf{x}^*))] \\ &= \mathbb{E}[f(\mathbf{x}_{k+1}) - f(\mathbf{x}_k) + \mu \langle \mathbf{x}^* - \nabla h^*(\mathbf{y}_{k+1}), \mathbf{y}_k - \mathbf{y}_{k+1} \rangle - \mu D_{h^*}(\mathbf{y}_k, \mathbf{y}_{k+1})] \\ &= \mathbb{E}\left[f(\mathbf{x}_{k+1}) - f(\mathbf{x}_k) + \frac{A_{k+1} - A_k}{A_k} \langle \mathbf{x}^* - \nabla h^*(\mathbf{y}_{k+1}), \nabla f(\mathbf{x}_{k+1}) \rangle\right] \\ &\quad + \mathbb{E}\left[\frac{A_{k+1} - A_k}{A_k} \langle \mathbf{x}^* - \nabla h^*(\mathbf{y}_{k+1}), \mu(\mathbf{y}_{k+1} - \nabla h(\mathbf{x}_{k+1})) + \Delta(\mathbf{x}_{k+1}) \rangle - \mu D_{h^*}(\mathbf{y}_k, \mathbf{y}_{k+1})\right] \\ &= \mathbb{E}\left[f(\mathbf{x}_{k+1}) - f(\mathbf{x}_k) + \frac{A_{k+1} - A_k}{A_k} \langle \mathbf{x}^* - \mathbf{x}_{k+1}, \nabla f(\mathbf{x}_{k+1}) \rangle + \langle \mathbf{x}_k - \mathbf{x}_{k+1}, \nabla f(\mathbf{x}_{k+1}) \rangle\right] \\ &\quad + \mathbb{E}\left[\frac{A_{k+1} - A_k}{A_k} \langle \mathbf{x}^* - \nabla h^*(\mathbf{y}_{k+1}), \mu(\mathbf{y}_{k+1} - \nabla h(\mathbf{x}_{k+1})) + \Delta(\mathbf{x}_{k+1}) \rangle - \mu D_{h^*}(\mathbf{y}_k, \mathbf{y}_{k+1})\right], \end{aligned}$$

where the second equality is due to the three point identity, the third equality follows from (5.3b) and the last one follows from (5.3a). By strong convexity of  $f$  we have

$$\begin{aligned} \langle \mathbf{x}^* - \mathbf{x}_{k+1}, \nabla f(\mathbf{x}_{k+1}) \rangle &\leq f(\mathbf{x}^*) - f(\mathbf{x}_{k+1}) - \mu D_h(\mathbf{x}^*, \mathbf{x}_{k+1}), \\ \langle \mathbf{x}_k - \mathbf{x}_{k+1}, \nabla f(\mathbf{x}_{k+1}) \rangle &\leq f(\mathbf{x}_k) - f(\mathbf{x}_{k+1}) - \mu D_h(\mathbf{x}_k, \mathbf{x}_{k+1}), \end{aligned}$$

which immediately implies

$$\begin{aligned} &\mathbb{E}[\mathcal{D}_{k+1} - \mathcal{D}_k] \\ &\leq \mathbb{E}\left[\frac{A_{k+1} - A_k}{A_k} (f(\mathbf{x}^*) - f(\mathbf{x}_{k+1}) - \mu D_h(\mathbf{x}^*, \mathbf{x}_{k+1})) - \mu D_h(\mathbf{x}_k, \mathbf{x}_{k+1})\right] \\ &\quad + \mathbb{E}\left[\frac{A_{k+1} - A_k}{A_k} \langle \mathbf{x}^* - \nabla h^*(\mathbf{y}_{k+1}), \mu(\mathbf{y}_{k+1} - \nabla h(\mathbf{x}_{k+1})) + \Delta(\mathbf{x}_{k+1}) \rangle - \mu D_{h^*}(\mathbf{y}_k, \mathbf{y}_{k+1})\right] \\ &= \mathbb{E}\left[\frac{A_{k+1} - A_k}{A_k} (-\mathcal{D}_{k+1} + \mu D_{h^*}(\mathbf{y}_{k+1}, \nabla h(\mathbf{x}^*)) - \mu D_h(\mathbf{x}^*, \mathbf{x}_{k+1})) - \mu D_h(\mathbf{x}_k, \mathbf{x}_{k+1})\right] \\ &\quad + \mathbb{E}\left[\frac{A_{k+1} - A_k}{A_k} \langle \mathbf{x}^* - \nabla h^*(\mathbf{y}_{k+1}), \mu(\mathbf{y}_{k+1} - \nabla h(\mathbf{x}_{k+1})) + \Delta(\mathbf{x}_{k+1}) \rangle - \mu D_h(\nabla h^*(\mathbf{y}_{k+1}), \nabla h^*(\mathbf{y}_k))\right] \\ &\leq \frac{A_{k+1} - A_k}{A_k} \mathbb{E}[-\mathcal{D}_{k+1} + \mu D_{h^*}(\mathbf{y}_{k+1}, \nabla h(\mathbf{x}^*)) - \mu D_h(\mathbf{x}^*, \mathbf{x}_{k+1})] - \frac{\mu\mu_h}{2} \|\nabla h^*(\mathbf{y}_k) - \nabla h^*(\mathbf{y}_{k+1})\|^2 \\ &\quad + \frac{A_{k+1} - A_k}{A_k} \mathbb{E}[\mu \langle \mathbf{x}^* - \nabla h^*(\mathbf{y}_{k+1}), \mathbf{y}_{k+1} - \nabla h(\mathbf{x}_{k+1}) \rangle + \langle \mathbf{x}^* - \nabla h^*(\mathbf{y}_{k+1}), \Delta(\mathbf{x}_{k+1}) \rangle] \\ &= \frac{A_{k+1} - A_k}{A_k} \mathbb{E}[-\mathcal{D}_{k+1} - \mu D_h(\nabla h^*(\mathbf{y}_{k+1}), \mathbf{x}_{k+1})] \\ &\quad - \frac{\mu\mu_h}{2} \|\nabla h^*(\mathbf{y}_k) - \nabla h^*(\mathbf{y}_{k+1})\|^2 + \frac{A_{k+1} - A_k}{A_k} \mathbb{E}[\langle \mathbf{x}^* - \nabla h^*(\mathbf{y}_{k+1}), \Delta(\mathbf{x}_{k+1}) \rangle] \\ &\leq \frac{A_{k+1} - A_k}{A_k} \mathbb{E}[-\mathcal{D}_{k+1}] + \frac{A_{k+1} - A_k}{A_k} \mathbb{E}[\langle \mathbf{x}^* - \nabla h^*(\mathbf{y}_{k+1}), \Delta(\mathbf{x}_{k+1}) \rangle] - \frac{\mu\mu_h}{2} \|\nabla h^*(\mathbf{y}_k) - \nabla h^*(\mathbf{y}_{k+1})\|^2, \end{aligned}$$

where the second inequality is due to the strong convexity of  $h$  and the last equality follows from three point identity. We now give an upper bound of the last term in the above inequality. Note that  $\mathbf{y}_k$  is independent of  $\Delta(\mathbf{x}_{k+1})$  according to

(5.3b) and that  $\mathbb{E}[\Delta(\mathbf{x}_{k+1})] = \mathbf{0}$ , then

$$\begin{aligned} & \frac{A_{k+1} - A_k}{A_k} \mathbb{E}[\langle \mathbf{x}^* - \nabla h^*(\mathbf{y}_{k+1}), \Delta(\mathbf{x}_{k+1}) \rangle] - \frac{\mu\mu_h}{2} \|\nabla h^*(\mathbf{y}_k) - \nabla h^*(\mathbf{y}_{k+1})\|^2 \\ &= \frac{A_{k+1} - A_k}{A_k} \mathbb{E}[\langle \nabla h^*(\mathbf{y}_k) - \nabla h^*(\mathbf{y}_{k+1}), \Delta(\mathbf{x}_{k+1}) \rangle] - \frac{\mu\mu_h}{2} \|\nabla h^*(\mathbf{y}_k) - \nabla h^*(\mathbf{y}_{k+1})\|^2 \\ &\leq \frac{(A_{k+1} - A_k)^2 \sigma^2}{2\mu\mu_h A_k^2}, \end{aligned}$$

where the last inequality use the fact that  $bx - ax^2/2 \leq b^2/(2a)$  for  $a > 0$  and  $\mathbb{E}[\|\Delta(\mathbf{x}_{k+1})\|^2 | \mathbf{x}_{k+1}] \leq \sigma^2$ . This immediately yields

$$\mathbb{E}[A_{k+1} \mathcal{D}_{k+1} - A_k \mathcal{D}_k] \leq \frac{(A_{k+1} - A_k)^2 \sigma^2}{A_k 2\mu\mu_h}.$$

Plugging the definition that  $\mathcal{E}_k = A_k \mathcal{D}_k$  into the above inequality, and summing from 0 to  $k - 1$ , we obtain

$$\mathbb{E}[\mathcal{E}_k] \leq \mathcal{E}_0 + \frac{\sigma^2}{2\mu\mu_h} \sum_{i=0}^{k-1} \frac{(A_{i+1} - A_i)^2}{A_i}.$$

Choose  $A_k = k(k+1)/2$  and  $A_0 = 1$ , we can see that the step size of Algorithm 1 is  $1/k$ . Applying Lemma D.3 and the definition of  $\mathcal{E}_k$  yields the following convergence rate

$$\mathbb{E}[f(\mathbf{x}_k) - f(\mathbf{x}^*)] \leq \frac{\mathbb{E}[\mathcal{E}_k]}{A_k} \leq \frac{2\mathcal{E}_0}{k(k+1)} + \frac{2\sigma^2}{(k+1)\mu\mu_h}.$$

□

## B.2. Proof of Theorem 5.3

We first lay down the following technical lemma about the gradient bound of  $f$  over  $\mathcal{X}$ .

**Lemma B.1.** Suppose  $f$  is  $\mu$ -strongly convex and  $L$ -smooth. Then we have

$$\|\nabla f(\mathbf{x})\|_* \leq \frac{L\sqrt{2M_{h,\mathcal{X}}}}{\sqrt{\mu_h}} + \|\nabla f(\mathbf{x}^*)\|_*,$$

where  $M_{h,\mathcal{X}} = \sup_{\mathbf{x}, \mathbf{x}' \in \mathcal{X}} D_h(\mathbf{x}, \mathbf{x}')$ .

*Proof of Theorem 5.3.* Recall the Lyapunov function in (5.4) and the definition that  $\mathcal{E}_k = A_k \mathcal{D}_k$ . Similar to the proof of Theorem 5.1 we have

$$\begin{aligned} \mathbb{E}[\mathcal{D}_{k+1} - \mathcal{D}_k] &= \mathbb{E}[f(\mathbf{x}_{k+1}) - f(\mathbf{x}_k) + \mu D_{h^*}(\mathbf{y}_{k+1}, \nabla h(\mathbf{x}^*)) - \mu D_{h^*}(\mathbf{y}_k, \nabla h(\mathbf{x}^*))] \\ &= \mathbb{E}[f(\mathbf{x}_{k+1}) - f(\mathbf{x}_k) + \mu \langle \mathbf{x}^* - \nabla h^*(\mathbf{y}_k), \mathbf{y}_k - \mathbf{y}_{k+1} \rangle + \mu D_{h^*}(\mathbf{y}_{k+1}, \mathbf{y}_k)] \\ &= \mathbb{E}\left[f(\mathbf{x}_{k+1}) - f(\mathbf{x}_k) + \frac{A_{k+1} - A_k}{A_k} \langle \mathbf{x}^* - \nabla h^*(\mathbf{y}_k), \nabla f(\mathbf{x}_{k+1}) \rangle\right] \\ &\quad + \mathbb{E}\left[\frac{A_{k+1} - A_k}{A_k} \langle \mathbf{x}^* - \nabla h^*(\mathbf{y}_k), \mu(\mathbf{y}_k - \nabla h(\mathbf{x}_{k+1})) + \Delta(\mathbf{x}_{k+1}) \rangle + \mu D_{h^*}(\mathbf{y}_{k+1}, \mathbf{y}_k)\right] \\ &= \mathbb{E}\left[f(\mathbf{x}_{k+1}) - f(\mathbf{x}_k) + \frac{A_{k+1} - A_k}{A_k} \langle \mathbf{x}^* - \mathbf{x}_{k+1}, \nabla f(\mathbf{x}_{k+1}) \rangle + \langle \mathbf{x}_k - \mathbf{x}_{k+1}, \nabla f(\mathbf{x}_{k+1}) \rangle\right] \\ &\quad + \mathbb{E}\left[\frac{A_{k+1} - A_k}{A_k} \langle \mathbf{x}^* - \nabla h^*(\mathbf{y}_k), \mu(\mathbf{y}_k - \nabla h(\mathbf{x}_{k+1})) + \Delta(\mathbf{x}_{k+1}) \rangle + \mu D_{h^*}(\mathbf{y}_{k+1}, \mathbf{y}_k)\right], \end{aligned}$$

where the second equation comes from the three point identity, the third and fourth equations are due to (5.5b) and (5.5a) respectively. Note that  $h$  is  $\mu_h$ -strongly convex and  $L_h$ -smooth. Without loss of generality, we assume that  $L_h = 1$ ;

otherwise, we can replace  $h$  with  $h' = h/L_h$  which is  $\mu_h/L_h$ -strongly convex and 1-smooth. By strong convexity of  $f$  we have

$$\begin{aligned}
 \mathbb{E}[\mathcal{D}_{k+1} - \mathcal{D}_k] &\leq \mathbb{E}\left[\frac{A_{k+1} - A_k}{A_k} (f(\mathbf{x}^*) - f(\mathbf{x}_{k+1}) - \mu D_h(\mathbf{x}^*, \mathbf{x}_{k+1})) - \mu D_h(\mathbf{x}_k, \mathbf{x}_{k+1})\right] \\
 &\quad + \mathbb{E}\left[\frac{A_{k+1} - A_k}{A_k} \langle \mathbf{x}^* - \nabla h^*(\mathbf{y}_k), \mu(\mathbf{y}_k - \nabla h(\mathbf{x}_{k+1})) + \Delta(\mathbf{x}_{k+1}) \rangle + \mu D_{h^*}(\mathbf{y}_{k+1}, \mathbf{y}_k)\right] \\
 &\leq \frac{A_{k+1} - A_k}{A_k} \mathbb{E}\left[-\mathcal{D}_{k+1} + \mu(D_h(\mathbf{x}^*, \nabla h^*(\mathbf{y}_{k+1})) - D_h(\mathbf{x}^*, \mathbf{x}_{k+1}))\right] \\
 &\quad + \mathbb{E}\left[\frac{A_{k+1} - A_k}{A_k} \langle \mathbf{x}^* - \nabla h^*(\mathbf{y}_k), \mu(\mathbf{y}_k - \nabla h(\mathbf{x}_{k+1})) + \Delta(\mathbf{x}_{k+1}) \rangle + \mu D_{h^*}(\mathbf{y}_{k+1}, \mathbf{y}_k)\right] \\
 &= \frac{A_{k+1} - A_k}{A_k} \mathbb{E}\left[-\mathcal{D}_{k+1} + \mu(\langle \mathbf{x}^* - \nabla h^*(\mathbf{y}_{k+1}), \nabla h(\mathbf{x}_{k+1}) - \mathbf{y}_{k+1} \rangle - D_h(\nabla h^*(\mathbf{y}_{k+1}), \mathbf{x}_{k+1}))\right] \\
 &\quad + \mathbb{E}\left[\frac{A_{k+1} - A_k}{A_k} \langle \mathbf{x}^* - \nabla h^*(\mathbf{y}_k), \mu(\mathbf{y}_k - \nabla h(\mathbf{x}_{k+1})) + \Delta(\mathbf{x}_{k+1}) \rangle + \mu D_{h^*}(\mathbf{y}_{k+1}, \mathbf{y}_k)\right] \\
 &= -\frac{A_{k+1} - A_k}{A_k} \mathcal{D}_{k+1} + \mu \mathbb{E}\left[D_{h^*}(\mathbf{y}_{k+1}, \mathbf{y}_k) + \frac{A_{k+1} - A_k}{A_k} \langle \mathbf{x}^* - \nabla h^*(\mathbf{y}_k), \Delta(\mathbf{x}_{k+1}) \rangle\right] \\
 &\quad + \mu \frac{A_{k+1} - A_k}{A_k} \mathbb{E}[\langle \nabla h(\mathbf{x}_{k+1}) - \mathbf{y}_{k+1}, \nabla h^*(\mathbf{y}_k) - \nabla h^*(\mathbf{y}_{k+1}) \rangle - D_{h^*}(\nabla h(\mathbf{x}_{k+1}), \mathbf{y}_{k+1})] \\
 &\quad + \mu \frac{A_{k+1} - A_k}{A_k} \mathbb{E}[\langle \mathbf{x}^* - \nabla h^*(\mathbf{y}_k), \nabla h(\mathbf{x}_{k+1}) - \mathbf{y}_{k+1} \rangle + \langle \mathbf{x}^* - \nabla h^*(\mathbf{y}_k), \mathbf{y}_k - \nabla h(\mathbf{x}_{k+1}) \rangle] \\
 &\leq -\frac{A_{k+1} - A_k}{A_k} \mathcal{D}_{k+1} + \mu \mathbb{E}\left[\frac{A_{k+1} - A_k}{A_k} \langle \mathbf{x}^* - \nabla h^*(\mathbf{y}_k), \mathbf{y}_k - \mathbf{y}_{k+1} \rangle + D_{h^*}(\mathbf{y}_{k+1}, \mathbf{y}_k)\right] \\
 &\quad + \mu \frac{A_{k+1} - A_k}{A_k} \mathbb{E}[\|\nabla h(\mathbf{x}_{k+1}) - \mathbf{y}_{k+1}\|_* \|\nabla h^*(\mathbf{y}_k) - \nabla h^*(\mathbf{y}_{k+1})\| - \frac{1}{2} \|\nabla h(\mathbf{x}_{k+1}) - \mathbf{y}_{k+1}\|_*^2]
 \end{aligned}$$

where the second inequality follows from the definition of  $\mathcal{D}_{k+1}$  and that  $D_h(\mathbf{x}_k, \mathbf{x}_{k+1})$  is non-negative, the first equality is due to the three point identity, and the last inequality is due to the  $1/\mu_h$ -smoothness of  $h^*$ , Cauchy's inequality and the fact that  $\mathbf{y}_k$  is independent of  $\Delta(\mathbf{x}_{k+1})$  and  $\mathbb{E}[\Delta(\mathbf{x}_{k+1})] = \mathbf{0}$ . For the last term in the above inequality, we have

$$\begin{aligned}
 &\|\nabla h(\mathbf{x}_{k+1}) - \mathbf{y}_{k+1}\|_* \|\nabla h^*(\mathbf{y}_k) - \nabla h^*(\mathbf{y}_{k+1})\| - \frac{1}{2} \|\nabla h(\mathbf{x}_{k+1}) - \mathbf{y}_{k+1}\|_*^2 \\
 &= -\frac{1}{2} (\|\nabla h(\mathbf{x}_{k+1}) - \mathbf{y}_{k+1}\|_* - \|\nabla h^*(\mathbf{y}_k) - \nabla h^*(\mathbf{y}_{k+1})\|)^2 + \frac{1}{2} \|\nabla h^*(\mathbf{y}_k) - \nabla h^*(\mathbf{y}_{k+1})\|^2 \\
 &\leq \frac{1}{2} \|\nabla h^*(\mathbf{y}_k) - \nabla h^*(\mathbf{y}_{k+1})\|^2.
 \end{aligned}$$

Therefore, we obtain

$$\begin{aligned}
 \mathbb{E}[\mathcal{D}_{k+1} - \mathcal{D}_k] &\leq -\frac{A_{k+1} - A_k}{A_k} \mathcal{D}_{k+1} + \mu \mathbb{E}\left[\frac{A_{k+1} - A_k}{A_k} \langle \mathbf{x}^* - \nabla h^*(\mathbf{y}_k), \mathbf{y}_k - \mathbf{y}_{k+1} \rangle + D_{h^*}(\mathbf{y}_{k+1}, \mathbf{y}_k)\right] \\
 &\quad + \mu \frac{A_{k+1} - A_k}{A_k} \mathbb{E}\left[\frac{1}{2} \|\nabla h^*(\mathbf{y}_k) - \nabla h^*(\mathbf{y}_{k+1})\|^2\right] \\
 &\leq -\frac{A_{k+1} - A_k}{A_k} \mathcal{D}_{k+1} + \mu \mathbb{E}\left[\frac{A_{k+1} - A_k}{A_k} \|\mathbf{x}^* - \nabla h^*(\mathbf{y}_k)\| \|\mathbf{y}_{k+1} - \mathbf{y}_k\|_* + \frac{1}{2\mu_h} \|\mathbf{y}_{k+1} - \mathbf{y}_k\|_*^2\right] \\
 &\quad + \mu \frac{A_{k+1} - A_k}{A_k} \mathbb{E}\left[\frac{1}{2\mu_h^2} \|\mathbf{y}_{k+1} - \mathbf{y}_k\|_*^2\right] \\
 &\leq -\frac{A_{k+1} - A_k}{A_k} \mathcal{D}_{k+1} + \mu \mathbb{E}\left[\frac{(A_{k+1} - A_k) \sqrt{2M_{h, \mathcal{X}}}}{\sqrt{\mu_h} A_k} \|\mathbf{y}_{k+1} - \mathbf{y}_k\|_* + \frac{1}{2\mu_h} \|\mathbf{y}_{k+1} - \mathbf{y}_k\|_*^2\right] \\
 &\quad + \mu \frac{A_{k+1} - A_k}{A_k} \mathbb{E}\left[\frac{1}{2\mu_h^2} \|\mathbf{y}_{k+1} - \mathbf{y}_k\|_*^2\right], \tag{B.1}
 \end{aligned}$$

where the second inequality follows from Cauchy's inequality and the  $1/\mu_h$ -smoothness of  $h^*$ . Further by (5.5b) we have

$$\begin{aligned}\mathbb{E}[\|\mathbf{y}_{k+1} - \mathbf{y}_k\|_*] &= \frac{A_{k+1} - A_k}{A_k} \mathbb{E} \left[ \left\| \frac{1}{\mu} (\nabla f(\mathbf{x}_{k+1}) + \Delta(\mathbf{x}_{k+1})) + \mathbf{y}_k - \nabla h(\mathbf{x}_{k+1}) \right\|_2 \right] \\ &\leq \frac{A_{k+1} - A_k}{\mu A_k} \mathbb{E} [\|\nabla f(\mathbf{x}_{k+1})\|_* + \|\Delta(\mathbf{x}_{k+1})\|_* + \mu \|\mathbf{y}_k - \nabla h(\mathbf{x}_{k+1})\|_*] \\ &\leq \frac{(A_{k+1} - A_k)}{\mu A_k} \left( \frac{L\sqrt{2M_{h,\mathcal{X}}}}{\sqrt{\mu_h}} + \|\nabla f(\mathbf{x}^*)\|_* + \sigma + \mu \mathbb{E}[\|\mathbf{y}_k - \nabla h(\mathbf{x}_{k+1})\|_*] \right),\end{aligned}\quad (\text{B.2})$$

where the second inequality is due to Lemma B.1. By (5.5a) we have that

$$\begin{aligned}\|\mathbf{y}_k - \nabla h(\mathbf{x}_{k+1})\|_* &= \left\| \nabla h \left( \mathbf{x}_{k+1} + \frac{A_k}{A_{k+1} - A_k} (\mathbf{x}_{k+1} - \mathbf{x}_k) \right) - \nabla h(\mathbf{x}_{k+1}) \right\|_* \\ &\leq \frac{A_k}{A_{k+1} - A_k} \|\mathbf{x}_{k+1} - \mathbf{x}_k\|_2 \\ &= \|\nabla h^*(\mathbf{y}_k) - \mathbf{x}_{k+1}\|_2 \\ &\leq \sqrt{\frac{2M_{h,\mathcal{X}}}{\mu_h}}.\end{aligned}\quad (\text{B.3})$$

Substituting (B.1) with and (B.2) and (B.3) yields

$$\begin{aligned}\mathbb{E}[\mathcal{D}_{k+1} - \mathcal{D}_k] &\leq -\frac{A_{k+1} - A_k}{A_k} \mathcal{D}_{k+1} + \frac{\mu\sqrt{2M_{h,\mathcal{X}}}(A_{k+1} - A_k)}{\sqrt{\mu_h} A_k} \mathbb{E}[\|\mathbf{y}_{k+1} - \mathbf{y}_k\|_*] + \frac{\mu}{2\mu_h} \mathbb{E}[\|\mathbf{y}_{k+1} - \mathbf{y}_k\|_2^2] \\ &\quad + \frac{\mu(A_{k+1} - A_k)}{2\mu_h^2 A_k} \mathbb{E}[\|\mathbf{y}_{k+1} - \mathbf{y}_k\|_*^2] \\ &\leq -\frac{A_{k+1} - A_k}{A_k} \mathcal{D}_{k+1} + \frac{\sqrt{2M_{h,\mathcal{X}}}(A_{k+1} - A_k)^2}{\sqrt{\mu_h} A_k^2} C_0 + \frac{(A_{k+1} - A_k)^2}{2\mu\mu_h A_k^2} C_0^2 \\ &\quad + \frac{(A_{k+1} - A_k)^3}{2\mu\mu_h^2 A_k^3} C_0^2 \\ &\leq -\frac{A_{k+1} - A_k}{A_k} \mathcal{D}_{k+1} + \frac{\sqrt{2M_{h,\mathcal{X}}}(A_{k+1} - A_k)^2}{\sqrt{\mu_h} A_k^2} C_0 + \frac{(A_{k+1} - A_k)^2}{2\mu\mu_h^2 A_k^2} \left( \mu_h + \frac{A_{k+1} - A_k}{A_k} \right) C_0^2,\end{aligned}$$

where  $C_0 = (L + \mu)\sqrt{2M_{h,\mathcal{X}}/\mu_h} + \sigma + \|\nabla f(\mathbf{x}^*)\|_*$ . Multiply  $A_k$  to both sides and we get

$$\mathbb{E}[A_{k+1}\mathcal{D}_{k+1} - A_k\mathcal{D}_k] \leq \frac{(A_{k+1} - A_k)^2}{2\mu_h^2 \mu A_k} \left[ \left( \mu_h + \frac{A_{k+1} - A_k}{A_k} \right) C_0^2 + 2\sqrt{2M_{h,\mathcal{X}}\mu_h^3} \mu C_0 \right].$$

Note that we have  $\mathcal{E}_k = A_k\mathcal{D}_k$ . Setting  $A_k = k(k+1)/2$ ,  $A_0 = 1$  and summing from 0 to  $k-1$  yields

$$\mathcal{E}_k \leq \mathcal{E}_0 + \frac{(\mu_h + 2)C_0^2 + 2\sqrt{2M_{h,\mathcal{X}}\mu_h^3} \mu C_0}{2\mu_h^2 \mu} \sum_{j=0}^{k-1} \frac{(A_{j+1} - A_j)^2}{A_j}.$$

Finally, we plug in the definition of  $\mathcal{E}_k$  to get

$$\mathbb{E}[f(\mathbf{x}_k) - f(\mathbf{x}^*)] \leq \frac{2\mathcal{E}_0}{k(k+1)} + \frac{(\mu_h + 2)C_0^2 + 2\sqrt{2M_{h,\mathcal{X}}\mu_h^3} \mu C_0}{\mu_h^2 \mu (k+1)}.$$

□

**B.3. Proof of Theorem 5.5**

*Proof of Theorem 5.5.* Since we have  $\mathcal{E}_k = A_k(f(\mathbf{x}_k) - f(\mathbf{x}^*) + \mu D_h(\mathbf{x}^*, \nabla h(\mathbf{y}_k)))$  by (5.4). We have

$$\begin{aligned}
 \mathbb{E}[\mathcal{E}_{k+1} - \mathcal{E}_k] &= \mathbb{E}[A_{k+1}f(\mathbf{x}_{k+1}) - A_k f(\mathbf{x}_k) - (A_{k+1} - A_k)f(\mathbf{x}^*)] \\
 &\quad + \mathbb{E}[\mu A_{k+1}D_h(\mathbf{x}^*, \nabla h^*(\mathbf{y}_{k+1})) - \mu A_k D_h(\mathbf{x}^*, \nabla h^*(\mathbf{y}_k))] \\
 &= \mathbb{E}[A_{k+1}(f(\mathbf{x}_{k+1}) - f(\mathbf{z}_{k+1})) + A_k(f(\mathbf{z}_{k+1}) - f(\mathbf{x}_k)) + (A_{k+1} - A_k)(f(\mathbf{z}_{k+1}) - f(\mathbf{x}^*))] \\
 &\quad + \mathbb{E}[\mu A_{k+1}D_h(\mathbf{x}^*, \nabla h^*(\mathbf{y}_{k+1})) - \mu A_k D_h(\mathbf{x}^*, \nabla h^*(\mathbf{y}_k))] \\
 &\leq \mathbb{E}[A_{k+1}(f(\mathbf{x}_{k+1}) - f(\mathbf{z}_{k+1})) + A_k[\langle \nabla f(\mathbf{z}_{k+1}), \mathbf{z}_{k+1} - \mathbf{x}_k \rangle - \mu D_h(\mathbf{x}_k, \mathbf{z}_{k+1})]] \\
 &\quad + \mathbb{E}[(A_{k+1} - A_k)[\langle \nabla f(\mathbf{z}_{k+1}), \mathbf{z}_{k+1} - \mathbf{x}^* \rangle - \mu D_h(\mathbf{x}^*, \mathbf{z}_{k+1})]] \\
 &\quad + \mathbb{E}[\mu A_{k+1}[D_h(\mathbf{x}^*, \nabla h^*(\mathbf{y}_{k+1})) - D_h(\mathbf{x}^*, \nabla h^*(\mathbf{y}_k))] + \mu(A_{k+1} - A_k)D_h(\mathbf{x}^*, \nabla h^*(\mathbf{y}_k))] \\
 &= \mathbb{E}[A_{k+1}(f(\mathbf{x}_{k+1}) - f(\mathbf{z}_{k+1})) + (A_{k+1} - A_k)\langle \nabla f(\mathbf{z}_{k+1}), \nabla h^*(\mathbf{y}_k) - \mathbf{x}^* \rangle] \\
 &\quad + \mathbb{E}[-\mu A_k D_h(\mathbf{x}_k, \mathbf{z}_{k+1}) + \mu(A_{k+1} - A_k)[D_h(\mathbf{x}^*, \nabla h^*(\mathbf{y}_k)) - D_h(\mathbf{x}^*, \mathbf{z}_{k+1})]] \\
 &\quad + \mathbb{E}[\mu A_{k+1}[D_h(\mathbf{x}^*, \nabla h^*(\mathbf{y}_{k+1})) - D_h(\mathbf{x}^*, \nabla h^*(\mathbf{y}_k))]], \tag{B.4}
 \end{aligned}$$

where the inequality is due to the strong convexity of  $f$  and the last equation follows from (5.6a). Denote  $C_k = (A_{k+1} - A_k)\langle \nabla f(\mathbf{z}_{k+1}), \nabla h^*(\mathbf{y}_k) - \mathbf{x}^* \rangle$ , and then we proceed to bound  $C_k$  as follows.

$$\begin{aligned}
 C_k &= (A_{k+1} - A_k)\langle \nabla f(\mathbf{z}_{k+1}), \nabla h^*(\mathbf{y}_k) - \nabla h^*(\mathbf{y}_{k+1}) \rangle + (A_{k+1} - A_k)\langle \nabla f(\mathbf{z}_{k+1}), \nabla h^*(\mathbf{y}_{k+1} - \mathbf{x}^*) \rangle \\
 &= (A_{k+1} - A_k)\langle \nabla f(\mathbf{z}_{k+1}), \nabla h^*(\mathbf{y}_k) - \nabla h^*(\mathbf{y}_{k+1}) \rangle + \mu A_{k+1}\langle \mathbf{y}_k - \mathbf{y}_{k+1}, \nabla h^*(\mathbf{y}_{k+1}) - \mathbf{x}^* \rangle \\
 &\quad + \mu(A_{k+1} - A_k)\langle \nabla h(\mathbf{z}_{k+1}) - \mathbf{y}_k, \nabla h^*(\mathbf{y}_{k+1}) - \mathbf{x}^* \rangle - (A_{k+1} - A_k)\langle \Delta(\mathbf{z}_{k+1}), \nabla h^*(\mathbf{y}_{k+1}) - \mathbf{x}^* \rangle \\
 &= (A_{k+1} - A_k)\langle \nabla f(\mathbf{z}_{k+1}), \nabla h^*(\mathbf{y}_k) - \nabla h^*(\mathbf{y}_{k+1}) \rangle - \mu A_{k+1}D_h(\nabla h^*(\mathbf{y}_{k+1}), \nabla h^*(\mathbf{y}_k)) \\
 &\quad + \mu A_{k+1}[D_h(\mathbf{x}^*, \nabla h^*(\mathbf{y}_k)) - D_h(\mathbf{x}^*, \nabla h^*(\mathbf{y}_{k+1}))] - (A_{k+1} - A_k)\langle \Delta(\mathbf{z}_{k+1}), \nabla h^*(\mathbf{y}_{k+1}) - \mathbf{x}^* \rangle \\
 &\quad + \mu(A_{k+1} - A_k)\langle \nabla h(\mathbf{z}_{k+1}) - \mathbf{y}_k, \nabla h^*(\mathbf{y}_{k+1}) - \mathbf{x}^* \rangle \\
 &\leq (A_{k+1} - A_k)\langle \nabla \tilde{f}(\mathbf{z}_{k+1}; \xi_{k+1}), \nabla h^*(\mathbf{y}_k) - \nabla h^*(\mathbf{y}_{k+1}) \rangle \\
 &\quad - \mu(A_{k+1} - A_k)D_h(\nabla h^*(\mathbf{y}_{k+1}), \nabla h^*(\mathbf{y}_k)) - \frac{\mu\mu_h A_k}{2} \|\nabla h^*(\mathbf{y}_{k+1}) - \nabla h^*(\mathbf{y}_k)\|_2^2 \\
 &\quad + \mu A_{k+1}[D_h(\mathbf{x}^*, \nabla h^*(\mathbf{y}_k)) - D_h(\mathbf{x}^*, \nabla h^*(\mathbf{y}_{k+1}))] - (A_{k+1} - A_k)\langle \Delta(\mathbf{z}_{k+1}), \nabla h^*(\mathbf{y}_k) - \mathbf{x}^* \rangle \\
 &\quad + \mu(A_{k+1} - A_k)\langle \nabla h(\mathbf{z}_{k+1}) - \mathbf{y}_k, \nabla h^*(\mathbf{y}_{k+1}) - \mathbf{x}^* \rangle, \tag{B.5}
 \end{aligned}$$

where the second equality is due to (5.6b), the third equality follows from the three point identity and the inequality is a result of the strong convexity of  $h$ . To make it brief, we define

$$\mathbf{w} = \frac{A_{k+1} - A_k}{A_{k+1}} \nabla h^*(\mathbf{y}_{k+1}) + \frac{A_k}{A_{k+1}} \mathbf{x}_k. \tag{B.6}$$

We immediately have that  $\mathbf{z}_{k+1} - \mathbf{w} = (A_{k+1} - A_k)/A_{k+1}(\nabla h^*(\mathbf{y}_k) - \nabla h^*(\mathbf{y}_{k+1}))$  by (5.6a). Therefore we can further bound  $C_k$  in the following way.

$$\begin{aligned}
 C_k &\leq A_{k+1}\langle \nabla \tilde{f}(\mathbf{z}_{k+1}; \xi_{k+1}), \mathbf{z}_{k+1} - \mathbf{w} \rangle - \frac{\mu\mu_h A_{k+1}^2 A_k}{2(A_{k+1} - A_k)^2} \|\mathbf{z}_{k+1} - \mathbf{w}\|_2^2 \\
 &\quad + \mu A_{k+1}[D_h(\mathbf{x}^*, \nabla h^*(\mathbf{y}_k)) - D_h(\mathbf{x}^*, \nabla h^*(\mathbf{y}_{k+1}))] - (A_{k+1} - A_k)\langle \Delta(\mathbf{z}_{k+1}), \nabla h^*(\mathbf{y}_k) - \mathbf{x}^* \rangle \\
 &\quad - \mu(A_{k+1} - A_k)D_h(\nabla h^*(\mathbf{y}_{k+1}), \nabla h^*(\mathbf{y}_k)) + \mu(A_{k+1} - A_k)\langle \nabla h(\mathbf{z}_{k+1}) - \mathbf{y}_k, \nabla h^*(\mathbf{y}_{k+1}) - \mathbf{x}^* \rangle \\
 &\leq A_{k+1}\langle \nabla \tilde{f}(\mathbf{z}_{k+1}; \xi_{k+1}), \mathbf{z}_{k+1} - \mathbf{w} \rangle - \frac{\mu\mu_h A_{k+1}^2 A_k}{(A_{k+1} - A_k)^2} D_h(\mathbf{z}_{k+1}, \mathbf{w}) \\
 &\quad + \mu A_{k+1}[D_h(\mathbf{x}^*, \nabla h^*(\mathbf{y}_k)) - D_h(\mathbf{x}^*, \nabla h^*(\mathbf{y}_{k+1}))] - (A_{k+1} - A_k)\langle \Delta(\mathbf{z}_{k+1}), \nabla h^*(\mathbf{y}_k) - \mathbf{x}^* \rangle \\
 &\quad - \mu(A_{k+1} - A_k)D_h(\nabla h^*(\mathbf{y}_{k+1}), \nabla h^*(\mathbf{y}_k)) + \mu(A_{k+1} - A_k)\langle \nabla h(\mathbf{z}_{k+1}) - \mathbf{y}_k, \nabla h^*(\mathbf{y}_{k+1}) - \mathbf{x}^* \rangle \\
 &\leq A_{k+1}\langle \nabla \tilde{f}(\mathbf{z}_{k+1}; \xi_{k+1}), \mathbf{z}_{k+1} - \mathbf{x}_{k+1} \rangle - \frac{\mu\mu_h^2 A_{k+1}^2 A_k}{2(A_{k+1} - A_k)^2} \|\mathbf{z}_{k+1} - \mathbf{x}_{k+1}\|_2^2 \\
 &\quad + \mu A_{k+1}[D_h(\mathbf{x}^*, \nabla h^*(\mathbf{y}_k)) - D_h(\mathbf{x}^*, \nabla h^*(\mathbf{y}_{k+1}))] - (A_{k+1} - A_k)\langle \Delta(\mathbf{z}_{k+1}), \nabla h^*(\mathbf{y}_k) - \mathbf{x}^* \rangle \\
 &\quad - \mu(A_{k+1} - A_k)D_h(\nabla h^*(\mathbf{y}_{k+1}), \nabla h^*(\mathbf{y}_k)) + \mu(A_{k+1} - A_k)\langle \nabla h(\mathbf{z}_{k+1}) - \mathbf{y}_k, \nabla h^*(\mathbf{y}_{k+1}) - \mathbf{x}^* \rangle, \tag{B.7}
 \end{aligned}$$

where in the second inequality we use the smoothness of  $h$  and in the last inequality we use (5.6c) and the strong convexity of  $h$ . Take expectation and note that  $\Delta(\mathbf{z}_{k+1})$  is independent of  $\mathbf{y}_k$ , we have

$$\begin{aligned} \mathbb{E}[C_k] &\leq \mathbb{E}\left[A_{k+1}\langle \nabla f(\mathbf{z}_{k+1}), \mathbf{z}_{k+1} - \mathbf{x}_{k+1} \rangle - \frac{\mu\mu_h^2 A_{k+1}^2 A_k}{2(A_{k+1} - A_k)^2} \|\mathbf{z}_{k+1} - \mathbf{x}_{k+1}\|_2^2\right] \\ &\quad + \mathbb{E}[\mu A_{k+1}[D_h(\mathbf{x}^*, \nabla h^*(\mathbf{y}_k)) - D_h(\mathbf{x}^*, \nabla h^*(\mathbf{y}_{k+1}))]] + A_{k+1}\langle \Delta(\mathbf{z}_{k+1}), \mathbf{z}_{k+1} - \mathbf{x}_{k+1} \rangle \\ &\quad + \mathbb{E}[-\mu(A_{k+1} - A_k)D_h(\nabla h^*(\mathbf{y}_{k+1}), \nabla h^*(\mathbf{y}_k)) + \mu(A_{k+1} - A_k)\langle \nabla h(\mathbf{z}_{k+1}) - \mathbf{y}_k, \nabla h^*(\mathbf{y}_{k+1}) - \mathbf{x}^* \rangle] \\ &\leq \mathbb{E}\left[A_{k+1}\left(f(\mathbf{z}_{k+1}) - f(\mathbf{x}_{k+1}) + \frac{L}{2}\|\mathbf{z}_{k+1} - \mathbf{x}_{k+1}\|_2^2\right) - \frac{\mu\mu_h^2 A_{k+1}^2 A_k}{2(A_{k+1} - A_k)^2} \|\mathbf{z}_{k+1} - \mathbf{x}_{k+1}\|_2^2\right] \\ &\quad + \mathbb{E}[\mu A_{k+1}[D_h(\mathbf{x}^*, \nabla h^*(\mathbf{y}_k)) - D_h(\mathbf{x}^*, \nabla h^*(\mathbf{y}_{k+1}))]] + A_{k+1}\langle \Delta(\mathbf{z}_{k+1}), \mathbf{z}_{k+1} - \mathbf{x}_{k+1} \rangle \\ &\quad + \mathbb{E}[-\mu(A_{k+1} - A_k)D_h(\nabla h^*(\mathbf{y}_{k+1}), \nabla h^*(\mathbf{y}_k)) + \mu(A_{k+1} - A_k)\langle \nabla h(\mathbf{z}_{k+1}) - \mathbf{y}_k, \nabla h^*(\mathbf{y}_{k+1}) - \mathbf{x}^* \rangle], \end{aligned}$$

where the second inequality follows from Assumption 3.4. Submitting the above inequality back into B.4 yields

$$\begin{aligned} &\mathbb{E}[\mathcal{E}_{k+1} - \mathcal{E}_k] \\ &\leq \mathbb{E}\left[\left(\frac{LA_{k+1}}{2} - \frac{\mu\mu_h^2 A_{k+1}^2 A_k}{2(A_{k+1} - A_k)^2}\right) \|\mathbf{z}_{k+1} - \mathbf{x}_{k+1}\|^2 - \mu A_k D_h(\mathbf{x}_k, \mathbf{z}_{k+1})\right] \\ &\quad + \mathbb{E}[\mu(A_{k+1} - A_k)[D_h(\mathbf{x}^*, \nabla h^*(\mathbf{y}_k)) - D_h(\mathbf{x}^*, \mathbf{z}_{k+1})]] - A_{k+1}\langle \Delta(\mathbf{z}_{k+1}), \mathbf{z}_{k+1} - \mathbf{x}_{k+1} \rangle \\ &\quad + \mu(A_{k+1} - A_k)\mathbb{E}[-D_h(\nabla h^*(\mathbf{y}_{k+1}), \nabla h^*(\mathbf{y}_k)) + \langle \nabla h(\mathbf{z}_{k+1}) - \mathbf{y}_k, \nabla h^*(\mathbf{y}_{k+1}) - \mathbf{x}^* \rangle] \\ &= \mathbb{E}\left[\left(\frac{LA_{k+1}}{2} - \frac{\mu\mu_h^2 A_{k+1}^2 A_k}{2(A_{k+1} - A_k)^2}\right) \|\mathbf{z}_{k+1} - \mathbf{x}_{k+1}\|^2 - A_{k+1}\langle \Delta(\mathbf{z}_{k+1}), \mathbf{z}_{k+1} - \mathbf{x}_{k+1} \rangle - \mu A_k D_h(\mathbf{x}_k, \mathbf{z}_{k+1})\right] \\ &\quad + \mu(A_{k+1} - A_k)\mathbb{E}[\langle \nabla h(\mathbf{z}_{k+1}) - \mathbf{y}_k, \mathbf{x}^* - \nabla h^*(\mathbf{y}_k) \rangle - D_h(\nabla h^*(\mathbf{y}_k), \mathbf{z}_{k+1})] \\ &\quad + \mu(A_{k+1} - A_k)\mathbb{E}[-D_h(\nabla h^*(\mathbf{y}_{k+1}), \nabla h^*(\mathbf{y}_k)) + \langle \nabla h(\mathbf{z}_{k+1}) - \mathbf{y}_k, \nabla h^*(\mathbf{y}_{k+1}) - \mathbf{x}^* \rangle] \\ &\leq \mathbb{E}\left[\left(\frac{LA_{k+1}}{2} - \frac{\mu\mu_h^2 A_{k+1}^2 A_k}{2(A_{k+1} - A_k)^2}\right) \|\mathbf{z}_{k+1} - \mathbf{x}_{k+1}\|^2 - A_{k+1}\langle \Delta(\mathbf{z}_{k+1}), \mathbf{z}_{k+1} - \mathbf{x}_{k+1} \rangle\right] \\ &\quad - \mu(A_{k+1} - A_k)\mathbb{E}[D_h(\nabla h^*(\mathbf{y}_k), \mathbf{z}_{k+1}) + D_h(\nabla h^*(\mathbf{y}_{k+1}), \nabla h^*(\mathbf{y}_k))] \\ &\quad + \mu(A_{k+1} - A_k)\mathbb{E}[\langle \nabla h(\mathbf{z}_{k+1}) - \mathbf{y}_k, \nabla h^*(\mathbf{y}_{k+1}) - \nabla h^*(\mathbf{y}_k) \rangle] \\ &= \mathbb{E}\left[\left(\frac{LA_{k+1}}{2} - \frac{\mu\mu_h^2 A_{k+1}^2 A_k}{2(A_{k+1} - A_k)^2}\right) \|\mathbf{z}_{k+1} - \mathbf{x}_{k+1}\|^2 - A_{k+1}\langle \Delta(\mathbf{z}_{k+1}), \mathbf{z}_{k+1} - \mathbf{x}_{k+1} \rangle\right] \\ &\quad - \mu(A_{k+1} - A_k)\mathbb{E}[D_h(\nabla h^*(\mathbf{y}_{k+1}), \mathbf{z}_{k+1})], \end{aligned}$$

where the first equation follows from the three point identity, in the last inequality we drop the negative term  $-\mu A_k D_h(\mathbf{x}_k, \mathbf{z}_{k+1})$  and the last equation again follows from the three point identity. We further rearrange the above inequality and obtain

$$\begin{aligned} \mathbb{E}[\mathcal{E}_{k+1} - \mathcal{E}_k] &\leq \mathbb{E}\left[\left(\frac{LA_{k+1}}{2} - \frac{\mu\mu_h^2 A_{k+1}^2 A_k}{2(A_{k+1} - A_k)^2}\right) \|\mathbf{z}_{k+1} - \mathbf{x}_{k+1}\|^2 - A_{k+1}\langle \Delta(\mathbf{z}_{k+1}), \mathbf{z}_{k+1} - \mathbf{x}_{k+1} \rangle\right] \\ &\quad - \mu(A_{k+1} - A_k)\mathbb{E}[D_h(\nabla h^*(\mathbf{y}_{k+1}), \mathbf{z}_{k+1})] \\ &\leq \underbrace{\mathbb{E}\left[\frac{A_{k+1}}{2}\left(L - \frac{\mu\mu_h^2 A_{k+1}}{(A_{k+1} - A_k)^2}\right) \|\mathbf{z}_{k+1} - \mathbf{x}_{k+1}\|^2\right]}_{S_1} \\ &\quad + \underbrace{\mathbb{E}\left[-\frac{\mu\mu_h^2 A_{k+1}^2 (A_k - 1)}{2(A_{k+1} - A_k)^2} \|\mathbf{z}_{k+1} - \mathbf{x}_{k+1}\|^2 - A_{k+1}\langle \Delta(\mathbf{z}_{k+1}), \mathbf{z}_{k+1} - \mathbf{x}_{k+1} \rangle\right]}_{S_2}, \end{aligned} \tag{B.8}$$

where we used the fact that  $D_h(\nabla h^*(\mathbf{y}_{k+1}), \mathbf{z}_{k+1}) \geq 0$ . We choose  $A_k = \mu\mu_h^2(k+1)(k+2)/(4L) + 1$  and thus

$$S_1 \leq \mathbb{E}\left[\frac{A_{k+1}}{2}\left(L - L\frac{k+3}{k+2}\right) \|\mathbf{z}_{k+1} - \mathbf{x}_{k+1}\|^2\right] \leq 0. \tag{B.9}$$

For  $S_2$ , using Cauchy-Schwartz inequality yields

$$\begin{aligned}
 S_2 &\leq \mathbb{E} \left[ A_{k+1} \|\Delta(\mathbf{z}_{k+1})\|_2 \|\mathbf{z}_{k+1} - \mathbf{x}_{k+1}\|_2 - \frac{\mu\mu_h^2 A_{k+1}^2 (A_k - 1)}{2(A_{k+1} - A_k)^2} \|\mathbf{z}_{k+1} - \mathbf{x}_{k+1}\|_2^2 \right] \\
 &\leq \mathbb{E} \left[ \frac{(A_{k+1} - A_k)^2}{2\mu\mu_h^2 (A_k - 1)} \|\Delta(\mathbf{z}_{k+1})\|_2^2 \right] \\
 &\leq \frac{(A_{k+1} - A_k)^2 \sigma^2}{2\mu\mu_h^2 (A_k - 1)}, \tag{B.10}
 \end{aligned}$$

where for the second inequality we use the simple inequality that  $bx - ax^2/2 \leq b^2/2a$ ,  $\forall a > 0$  and the last inequality follows from the fact that  $\mathbb{E}[\|\Delta(\mathbf{z}_{k+1})\|_2^2] \leq \sigma^2$ . Then we submit (B.9) and (B.10) back into (B.8) and obtain

$$\mathbb{E}[\mathcal{E}_{k+1} - \mathcal{E}_k] \leq \frac{(A_{k+1} - A_k)^2 \sigma^2}{2\mu\mu_h^2 (A_k - 1)}.$$

Summing up the above inequality from 0 to  $k - 1$  yields

$$\mathbb{E}[\mathcal{E}_k] \leq A_0 \mathcal{E}_0 + \frac{\sigma^2}{2L} \sum_{i=0}^{k-1} \frac{i+2}{i+1} \leq A_0 \mathcal{E}_0 + \frac{\sigma^2 k}{L}.$$

Recall the definition that  $\mathcal{E}_k = A_k(f(\mathbf{x}_k) - f(\mathbf{x}^*) + \mu D_h(\mathbf{x}^*, \nabla h(\mathbf{y}_k)))$ , we have

$$\mathbb{E}[f(\mathbf{x}_k) - f(\mathbf{x}^*)] \leq \frac{\mathcal{E}_k}{A_k} \leq \frac{4LA_0 \mathcal{E}_0 + 4\sigma^2 k}{\mu\mu_h^2 (k+1)(k+2)},$$

which completes the proof.  $\square$

## C. Proof of Technical Lemmas

In this section, we provide the proof of technical lemmas used in the proof of main theorems.

*Proof of Lemma B.1.* By smoothness of  $f$  we have

$$\|\nabla f(\mathbf{x})\|_* = \|\nabla f(\mathbf{x}) - \nabla f(\mathbf{x}^*)\|_* + \|\nabla f(\mathbf{x}^*)\|_* \leq L\|\mathbf{x} - \mathbf{x}^*\| + \|\nabla f(\mathbf{x}^*)\|_*.$$

By the strong convexity of  $h$  we have

$$D_h(\mathbf{x}, \mathbf{x}') = h(\mathbf{x}) - h(\mathbf{x}') - \langle \nabla h(\mathbf{x}'), \mathbf{x} - \mathbf{x}' \rangle \geq \frac{\mu_h}{2} \|\mathbf{x} - \mathbf{x}'\|^2.$$

Combining the two inequalities above yields

$$\|\nabla f(\mathbf{x})\|_* \leq \frac{\sqrt{2}L}{\sqrt{\mu_h}} \sqrt{D_h(\mathbf{x}, \mathbf{x}^*)} + \|\nabla f(\mathbf{x}^*)\|_* \leq \frac{L\sqrt{2M_{h,\mathcal{X}}}}{\sqrt{\mu_h}} + \|\nabla f(\mathbf{x}^*)\|_*,$$

where  $M_{h,\mathcal{X}} = \sup_{\mathbf{x}, \mathbf{x}' \in \mathcal{X}} D_h(\mathbf{x}, \mathbf{x}')$ .  $\square$

## D. Auxiliary Lemmas

The following standard results on duality and Bregman divergence are widely used in the analysis of mirror descent (Lan, 2012; Ghadimi & Lan, 2012; Krichene et al., 2015; Krichene & Bartlett, 2017). Detailed discussion on the properties of Bregman divergence can be found in Banerjee et al. (2005).

**Lemma D.1.** If  $h$  is  $\mu_h$ -strongly convex for some constant  $\mu_h > 0$ , then its conjugate function  $h^*$  is  $1/\mu_h$ -smooth.

**Lemma D.2.** Suppose  $h$  is strongly convex, for all  $\mathbf{x}, \mathbf{x}' \in \mathcal{X}$ , it holds that

$$\nabla h^*(\nabla h(\mathbf{x})) = \mathbf{x}, \quad D_h(\mathbf{x}, \mathbf{x}') = D_{h^*}(\nabla h(\mathbf{x}'), \nabla h(\mathbf{x})).$$



The following lemma characterizes the upper bound of  $p$ -series  $\sum_{j=1}^k 1/j^p$ .

**Lemma D.3.** (Chlebus, 2009) For  $p < 0$ , the divergence rate of  $p$ -series is given by

$$1 + \frac{k^{1-p} - 1}{1 - p} \leq \sum_{j=1}^k \frac{1}{j^p} \leq \frac{(k+1)^{1-p} - 1}{1 - p}.$$

**Lemma D.4** (Three Point Identity (Chen & Teboulle, 1993)). Let  $D_h(\cdot, \cdot)$  be a Bregman divergence with distance generating function  $h$ . For any  $\mathbf{a}, \mathbf{b}$  that are interior points of  $\text{dom } h$  and  $\mathbf{c} \in \text{dom } h$ , we have

$$D_h(\mathbf{c}, \mathbf{a}) + D_h(\mathbf{a}, \mathbf{b}) - D_h(\mathbf{c}, \mathbf{b}) = \langle \nabla h(\mathbf{b}) - \nabla h(\mathbf{a}), \mathbf{c} - \mathbf{a} \rangle.$$
